# Supplementary material for: Particle Separation in a Microchannel with a T-Shaped Cross-Section Using Co-Flow of Newtonian and Viscoelastic Fluids
Source: MDPI journal article supplement (doi:10.3390/mi14101863), 2023-09-28
Supplement: s1 [file s1]

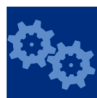

## Article

# Particle separation in microchannel with T-shaped cross-section using co-flow of Newtonian and viscoelastic fluids

Jinhyeuk Song <sup>1</sup>, Jaekyeong Jang <sup>2</sup>, Taehoon Kim <sup>1,2\*</sup> and Younghak Cho <sup>1,2\*</sup>

<sup>1</sup> Department of Mechanical System Design Engineering, Seoul National University of Science & Technology, 232 Gongneung-ro, Nowon-gu, Seoul 01811, Republic of Korea; toptree2@naver.com (J.S.)

<sup>2</sup> Department of Mechanical Design and Robot Engineering, Seoul National University of Science & Technology, 232 Gongneung-ro, Nowon-gu, Seoul 01811, Republic of Korea; jjangy5720@naver.com (J.J.)

\* Correspondence: tkim99@seoultech.ac.kr (T.K.); yhcho@seoultech.ac.kr (Y.C.); Tel.: +82-2-970-6340 (T.K.); +82-2-970-6361 (Y.C.)

**Abstract:** In this study, we investigated the particle separation phenomenon in a microchannel with a T-shaped cross-section, a unique design detailed in our previous study. Utilizing a co-flow system within this T-shaped microchannel, we examined two types of flow configuration: one where a Newtonian fluid served as the inner fluid and a viscoelastic fluid as the outer fluid (Newtonian/viscoelastic), and another where both the inner and outer fluids were Newtonian fluids (Newtonian/Newtonian). We introduced a mixture of three differently sized particles into the microchannel through the outer fluid, and observed that the co-flow of Newtonian/viscoelastic fluids effectively separated particles based on their size compared to Newtonian/Newtonian fluids. In this context, we evaluated and compared the particle separation efficiency, recovery rate, and enrichment factor across both co-flow configurations. The Newtonian/viscoelastic co-flow system demonstrated a superior efficiency and recovery ratio when compared to the Newtonian/Newtonian system. Additionally, we assessed the influence of the flow rate ratio between the inner and outer fluids on particle separation within each co-flow system. Our results indicated that increasing the flow rate ratio enhanced the separation efficiency, particularly in the Newtonian/viscoelastic co-flow configuration. Consequently, this study substantiates the potential of utilizing a Newtonian/viscoelastic co-flow system in a T-shaped straight microchannel for the simultaneous separation of three differently sized particles.

**Keywords:** T-shaped cross-section; particle separation; co-flow; Newtonian fluid; viscoelastic fluid

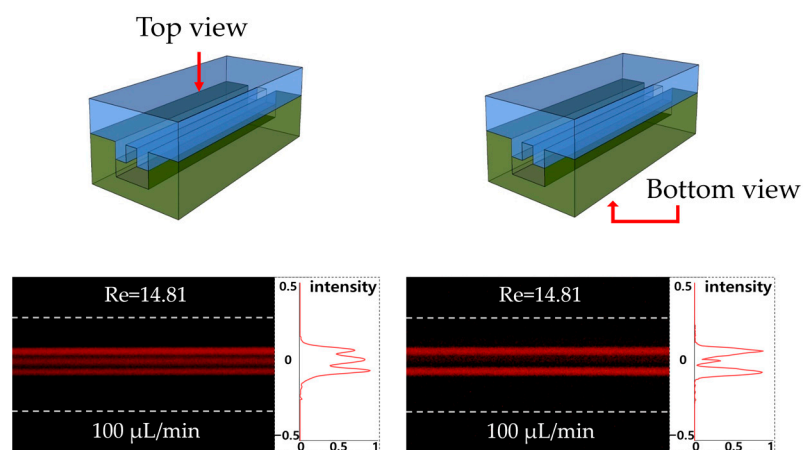

**Figure S1.** Fluorescent images and intensity graphs of particle (12  $\mu\text{m}$ ) focusing when viewed from the top and bottom under DI water

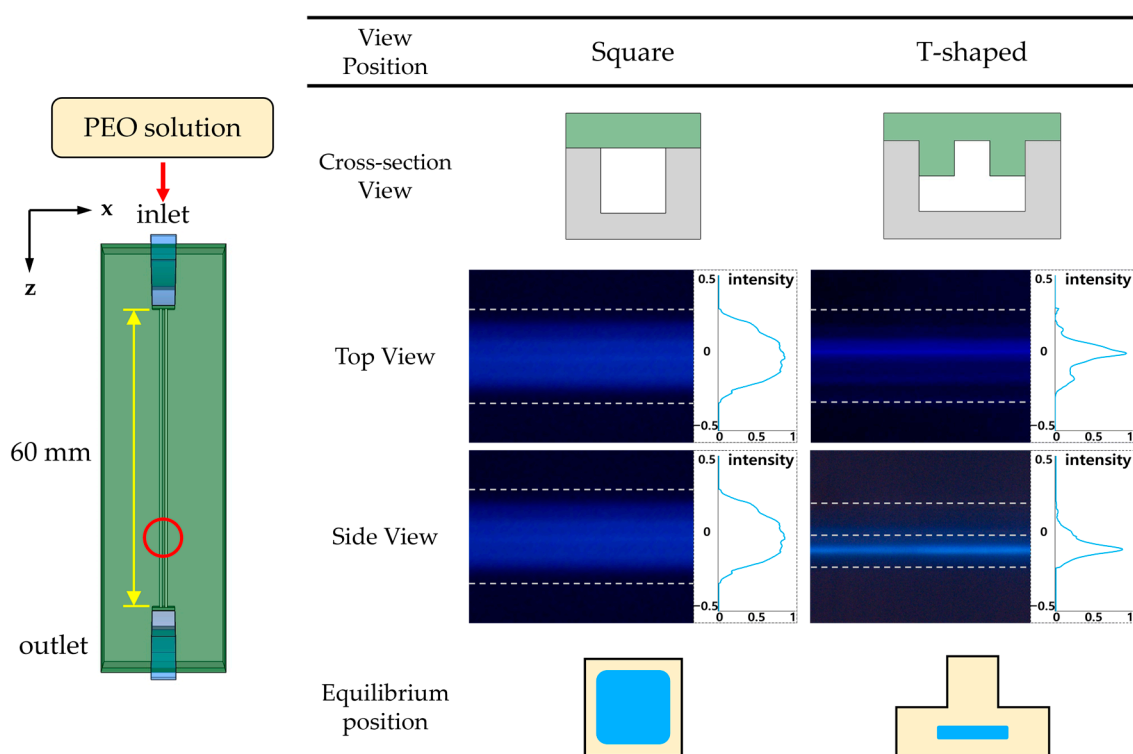

**Figure S2.** Comparison results in square channel and T-shaped cross-section channel with same hydraulic diameter under sheathless flow of PEO solution for 2.1  $\mu\text{m}$  particles.

**Table S1.** Separation efficiency, recovery ratio and enrichment factor of 2.1  $\mu\text{m}$ , 5.0  $\mu\text{m}$ , and 12  $\mu\text{m}$  particles. The total flow rate and flow rate ratio are 210  $\mu\text{L}/\text{min}$  and 6.

|        | Factor                   | 1 : 6             |                   |                  |
|--------|--------------------------|-------------------|-------------------|------------------|
|        |                          | 2.1 $\mu\text{m}$ | 5.0 $\mu\text{m}$ | 12 $\mu\text{m}$ |
| Case 1 | Separation efficiency(%) | 95.08             | 94.01             | 95               |
|        | Recovery ratio(%)        | 93.25             | 92.05             | 93.44            |
|        | Enrichment factor        | 26.4              | 20.83             | 103.5            |
| Case 2 | Separation efficiency(%) | 93.13             | 10.54             | 13.51            |
|        | Recovery ratio(%)        | 91.21             | 10.12             | 13.42            |
|        | Enrichment factor        | 1.26              | 0.79              | 33.28            |

**Table S2.** Separation efficiency of 2.1, 5.0, and 12  $\mu\text{m}$  particles (average of three determinations  $\pm$  standard deviation). The total flow rate and flow rate ratio are 210  $\mu\text{L}/\text{min}$  and 6.

| Efficiency (%) $\pm$ SD (%) (n=3) |                           |                   |                          |                  |                          |                  |                               |                   |                  |
|-----------------------------------|---------------------------|-------------------|--------------------------|------------------|--------------------------|------------------|-------------------------------|-------------------|------------------|
| Case                              | 1 : 6                     |                   |                          |                  |                          |                  |                               |                   |                  |
|                                   | (2.1, 5.0 $\mu\text{m}$ ) |                   | (2.1, 12 $\mu\text{m}$ ) |                  | (5.0, 12 $\mu\text{m}$ ) |                  | (2.1, 5.0, 12 $\mu\text{m}$ ) |                   |                  |
|                                   | 2.1 $\mu\text{m}$         | 5.0 $\mu\text{m}$ | 2.1 $\mu\text{m}$        | 12 $\mu\text{m}$ | 5.0 $\mu\text{m}$        | 12 $\mu\text{m}$ | 2.1 $\mu\text{m}$             | 5.0 $\mu\text{m}$ | 12 $\mu\text{m}$ |
| Case 1                            | 97.22 $\pm$ 0.2           | 95.13 $\pm$ 1.1   | 97.37 $\pm$ 0.1          | 98.22 $\pm$ 0.4  | 98.18 $\pm$ 0.3          | 95.03 $\pm$ 1.0  | 95.08 $\pm$ 0.3               | 94.01 $\pm$ 0.6   | 95.00 $\pm$ 1.2  |
| Case 2                            | 97.52 $\pm$ 0.9           | 9.64 $\pm$ 0.9    | 99.32 $\pm$ 0.1          | 16.08 $\pm$ 1.4  | 99.49 $\pm$ 0.1          | 13.79 $\pm$ 1.4  | 93.13 $\pm$ 0.9               | 10.54 $\pm$ 0.8   | 13.51 $\pm$ 1.4  |
